# Supplementary material for: Morphological and Quantitative Evidence for Altered Mesenchymal Stem Cell Remodeling of Collagen in an Oxidative Environment—Peculiar Effect of Epigallocatechin-3-Gallate
Source: MDPI journal article supplement (doi:10.3390/polym14193957), 2022-09-22
Supplement: s1 [file s1]

## Supplementary material for the manuscript entitled

“Morphological and quantitative evidence for altered mesenchymal stem cell remodeling of collagen in an oxidative environment – peculiar effect of epigallocatechin-3-gallate” to be considered for publication in “Polymers”, Special issue “Polymer Materials in Biomedical Application II”.

**Table S1.** Total anisotropy index (AI) of FITC labelled collagen samples, consisting of native (MTC), oxidized (MTC-OXI) and MTC-OXI pretreated with EGCG (MTC OXI/EGCG) measured for bare samples (- cells) and for samples (+ cells). The change of anisotropy index by the cells is presented as  $\Delta$  AI. More detailed measurements of the same parameters performed in the selected regions of interest (ROI): Outside the cells, the Cellular region, and the Central part which includes the nuclear/perinuclear cell region.

| Collagen Sample | Total anisotropy (- cells) | Total anisotropy (+ cells) | Change in the anisotropy ( $\Delta$ AI) | Region of interest (ROI) | Anisotropy of the region |
|-----------------|----------------------------|----------------------------|-----------------------------------------|--------------------------|--------------------------|
| MTC             | 0.069                      | 0.212                      | 0.143                                   | Outside Cell             | 0.009                    |
|                 |                            |                            |                                         | Cell region              | 0.383                    |
|                 |                            |                            |                                         | Central part             | 0.119                    |
| MTC OXI         | 0.028                      | 0.116                      | 0.088                                   | Outside Cell             | 0.020                    |
|                 |                            |                            |                                         | Cell region              | 0.448                    |
|                 |                            |                            |                                         | Central part             | 0.553                    |
| MTC             | 0.053                      | 0.083                      | 0.031                                   | Outside Cell             | 0.060                    |
| OXI/EGCG        |                            |                            |                                         | Cell region              | 0.374                    |
|                 |                            |                            |                                         | Central part             | 0.381                    |

**Table S2.** Total area in pixels, Type of regions of interest (ROI), Mean of fluorescence intensity (MFI) in pixels and Standard deviation (SD) of FITC collagen studied in different ROI: Outside the cells, the Cellular region, and the Central part. The native (MTC), oxidized (MTC-OXI), and EGCG pretreated (MTC-OXI/EGCG) collagen samples were measured and compared. The ratio Inside/Outside the cells of MFI for Cellular region and the Central part versus Outside the cells was calculated for the same collagen samples.

| Sample           | Total area<br>(pixels) | Type ROI        | MFI<br>(pixels) | SD   | Ratio<br>Inside/Outside<br>the cells |
|------------------|------------------------|-----------------|-----------------|------|--------------------------------------|
| MTC              | 1904820                | Outside Cell    | 4.88            | 1.85 |                                      |
|                  |                        | Cellular region | 5.41            | 2.56 | 1.11                                 |
|                  |                        | Central part    | 5.73            | 1.94 | 1.17                                 |
| MTC-OXI          | 1878228                | Outside Cell    | 3.03            | 0.80 |                                      |
|                  |                        | Cellular region | 3.58            | 1.47 | 1.18                                 |
|                  |                        | Central part    | 4.01            | 1.48 | 1.32                                 |
| MTC-<br>OXI/EGCG | 1893672                | Outside Cell    | 4.48            | 0.96 |                                      |
|                  |                        | Cellular region | 5.62            | 1.44 | 1.26                                 |
|                  |                        | Central part    | 7.02            | 1.14 | 1.57                                 |
